# Supplementary material
Source: MDPI journal article supplement (https://www.mdpi.com/2075-5309/11/9/384)
Supplement: s1 [file s1]

## Supplementary Materials

**Table S1a.** Round 1 Delphi study data (Q1 to Q15)

| Expert/Question | Q1 | Q2 | Q3 | Q4 | Q5 | Q6 | Q7 | Q8 | Q9 | Q10 | Q11 | Q12 | Q13 | Q14 | Q15 |
|-----------------|----|----|----|----|----|----|----|----|----|-----|-----|-----|-----|-----|-----|
| 1               | 4  | 5  | 4  | 4  | 4  | 3  | 4  | 3  | 3  | 3   | 3   | 3   | 3   | 3   | 3   |
| 2               | 4  | 2  | 4  | 4  | 3  | 3  | 4  | 3  | 4  | 4   | 4   | 3   | 3   | 4   | 3   |
| 3               | 3  | 5  | 5  | 5  | 4  | 1  | 4  | 2  | 4  | 4   | 4   | 4   | 2   | 3   | 2   |
| 4               | 4  | 5  | 5  | 4  | 4  | 3  | 3  | 4  | 5  | 3   | 4   | 4   | 5   | 4   | 4   |
| 5               | 4  | 4  | 4  | 4  | 4  | 3  | 4  | 4  | 4  | 4   | 4   | 4   | 4   | 4   | 4   |
| 6               | 4  | 3  | 4  | 4  | 4  | 4  | 4  | 5  | 5  | 5   | 5   | 3   | 5   | 4   | 4   |
| 7               | 4  | 5  | 5  | 5  | 4  | 4  | 4  | 4  | 4  | 4   | 4   | 4   | 5   | 4   | 4   |

**Table S1b.** Round 1 Delphi study data (Q16 to Q30)

| Expert/Question | Q16 | Q17 | Q18 | Q19 | Q20 | Q21 | Q22 | Q23 | Q24 | Q25 | Q26 | Q27 | Q28 | Q29 | Q30 |
|-----------------|-----|-----|-----|-----|-----|-----|-----|-----|-----|-----|-----|-----|-----|-----|-----|
| 1               | 3   | 3   | 3   | 3   | 3   | 3   | 3   | 3   | 3   | 3   | 3   | 3   | 3   | 3   | 3   |
| 2               | 2   | 2   | 2   | 3   | 4   | 5   | 5   | 4   | 5   | 5   | 4   | 4   | 4   | 4   | 3   |
| 3               | 2   | 1   | 2   | 2   | 2   | 2   | 2   | 2   | 1   | 1   | 1   | 1   | 1   | 1   | 1   |
| 4               | 4   | 4   | 3   | 3   | 3   | 3   | 3   | 3   | 3   | 3   | 3   | 3   | 3   | 3   | 3   |
| 5               | 4   | 3   | 3   | 4   | 4   | 4   | 4   | 4   | 4   | 4   | 4   | 3   | 4   | 4   | 3   |
| 6               | 4   | 4   | 4   | 4   | 4   | 4   | 4   | 4   | 4   | 4   | 4   | 3   | 4   | 4   | 4   |
| 7               | 4   | 3   | 5   | 5   | 4   | 4   | 4   | 5   | 4   | 4   | 5   | 3   | 4   | 5   | 3   |

**Table S2a.** Round 2 Delphi study data (Q1 to Q15)

| Expert/Question | Q1 | Q2 | Q3 | Q4 | Q5 | Q6 | Q7 | Q8 | Q9 | Q10 | Q11 | Q12 | Q13 | Q14 | Q15 |
|-----------------|----|----|----|----|----|----|----|----|----|-----|-----|-----|-----|-----|-----|
| 1               | 4  | 5  | 4  | 4  | 4  | 4  | 4  | 3  | 3  | 4   | 3   | 3   | 4   | 3   | 4   |
| 2               | 4  | 5  | 4  | 4  | 3  | 3  | 4  | 3  | 4  | 4   | 4   | 3   | 4   | 4   | 3   |
| 3               | 3  | 5  | 5  | 5  | 4  | 1  | 4  | 4  | 4  | 4   | 4   | 4   | 4   | 3   | 2   |
| 4               | 4  | 5  | 5  | 4  | 4  | 3  | 3  | 4  | 5  | 3   | 4   | 4   | 5   | 4   | 4   |
| 5               | 4  | 4  | 4  | 4  | 4  | 3  | 4  | 4  | 4  | 4   | 4   | 4   | 4   | 4   | 4   |
| 6               | 4  | 4  | 4  | 4  | 4  | 4  | 4  | 5  | 5  | 5   | 5   | 3   | 5   | 4   | 4   |
| 7               | 4  | 5  | 5  | 5  | 4  | 4  | 4  | 4  | 4  | 4   | 4   | 4   | 5   | 4   | 4   |

**Table S2b.** Round 2 Delphi study data (Q16 to Q30)

| Expert/Question | Q16 | Q17 | Q18 | Q19 | Q20 | Q21 | Q22 | Q23 | Q24 | Q25 | Q26 | Q27 | Q28 | Q29 | Q30 |
|-----------------|-----|-----|-----|-----|-----|-----|-----|-----|-----|-----|-----|-----|-----|-----|-----|
| 1               | 4   | 4   | 4   | 4   | 4   | 4   | 3   | 3   | 3   | 3   | 3   | 3   | 3   | 3   | 3   |
| 2               | 4   | 4   | 4   | 3   | 4   | 5   | 5   | 4   | 5   | 5   | 4   | 4   | 4   | 4   | 5   |
| 3               | 2   | 4   | 4   | 4   | 4   | 4   | 2   | 2   | 4   | 4   | 3   | 4   | 4   | 4   | 4   |
| 4               | 4   | 4   | 3   | 3   | 3   | 3   | 3   | 3   | 3   | 3   | 3   | 3   | 3   | 3   | 3   |
| 5               | 4   | 5   | 3   | 4   | 4   | 4   | 4   | 4   | 4   | 4   | 4   | 4   | 4   | 4   | 4   |
| 6               | 4   | 4   | 4   | 4   | 4   | 4   | 4   | 4   | 4   | 4   | 4   | 4   | 4   | 4   | 4   |
| 7               | 4   | 4   | 5   | 5   | 4   | 4   | 4   | 5   | 4   | 4   | 5   | 4   | 4   | 5   | 4   |

**Table S3.** Round 3 Delphi study data (7 questions)

| Expert/Question | A1 | A2 | A3 | A4 | B5 | B6 | B7 |
|-----------------|----|----|----|----|----|----|----|
| 1               | 4  | 4  | 5  | 4  | 4  | 4  | 4  |
| 2               | 4  | 4  | 5  | 4  | 4  | 5  | 4  |
| 3               | 4  | 3  | 5  | 4  | 5  | 3  | 5  |
| 4               | 4  | 4  | 5  | 4  | 4  | 4  | 4  |
| 5               | 4  | 4  | 4  | 4  | 4  | 4  | 4  |
| 6               | 4  | 4  | 5  | 4  | 4  | 4  | 5  |
| 7               | 4  | 4  | 4  | 4  | 4  | 4  | 5  |
